# Supplementary material for: The probiotic Lactiplantibacillus plantarum attenuates ovariectomy-induced osteoporosis through osteoimmunological signaling
Source: Royal Society of Chemistry journal article supplement (doi:10.1039/d3fo00681f), 2023-01-01
Supplement: d3fo00681f1.pdf [file d3fo00681f1.pdf]

Supplementary Table 1.

The primers used for fecal bacteria-related 16S rRNA genes sequences.

| Target                                  | primer sequence (5'-3')    |
|-----------------------------------------|----------------------------|
| Total bacteria-F                        | GTGSTGCAYGGYTGTCGTCA       |
| Total bacteria-R                        | ACGTCRTCCMCACCTTCCTC       |
| <i>Lactiplantibacillus plantarum</i> -F | GCAGCTACCTTCGAAGAATCCA     |
| <i>Lactiplantibacillus plantarum</i> -R | GGGAAACTTGGTTCAGCAACA      |
| <i>Lactobacillus</i> -F                 | AGCAGTAGGGAATCTTCCA        |
| <i>Lactobacillus</i> -R                 | CACCGCTACACATGGAG          |
| <i>Bifidobacterium</i> -F               | CGCGTCYGGTGTGAAAG          |
| <i>Bifidobacterium</i> -R               | CCCCACATCCAGCATCCA         |
| <i>Akkemansia muciniphila</i> -F        | CAGCACGTGAAGGTGGGGAC       |
| <i>Akkemansia muciniphila</i> -R        | CCTTGCGGTTGGCTTCAGAT       |
| Bacteroidetes-F                         | CTGAACCAGCCAAGTAGCG        |
| Bacteroidetes-R                         | CCGCAAACCTTTCACAACCTGACTTA |
| Firmicutes-F                            | TGAAACTCAAAGGAATTGACG      |
| Firmicutes-R                            | ACCATGCACCACCTGTC          |
| Lachnospiraceae-F                       | CGTCGCAAACGCATTAAGTA       |
| Lachnospiraceae-R                       | TAAGGTTCTTCGCGTTGCTT       |

Supplementary Table 2. The sequence of primers used for osteoimmune- and osteoporosis-related genes expression.

| Target                  | primer sequence (5'-3')   |
|-------------------------|---------------------------|
| GAPDH -F                | GCACAGTCAAGGCCGAGAAT      |
| GAPDH-R                 | GCCTTCTCCATGGTGGTGAA      |
| IL-10-F                 | CCTGGCAAACAAAATGAGGT      |
| IL-10-R                 | TGCGTGTGTAGGCAGTCTTC      |
| IL-1 $\beta$ -F         | GCAATGGTCGGGACATAGTT      |
| IL-1 $\beta$ -R         | AGACCTGACTTGGCAGAGGA      |
| IL-6-F                  | TCTCTCCGCAAGAGACTTCCA     |
| IL-6-R                  | ATACTGGTCTGTTGTGGGTGG     |
| TNF $\alpha$ -F         | ACCACGCTCTTCTGTCTACTG     |
| TNF $\alpha$ -R         | CTTGGTGGTTTGCTACGAC       |
| TGF- $\beta$ -F         | GCTCCATACAGTCCCAGGTG      |
| TGF- $\beta$ -R         | GTTCTGCAAGCGAAAGACCC      |
| Osteoprotegerin (OPG)-F | GGACGTCAGCTCTTGTGTGA      |
| Osteoprotegerin (OPG)-R | GCATTCATCACTCGTGTGCC      |
| RANKL-F                 | CAGGTGTAAGGTTTTCTGTGC     |
| RANKL-R                 | AGCACCAGTTAAATACATCTTGACA |

Supplementary Table 3. The Uterine weight in Sham and ovariectomized (OVX) rats treated with *Lp. plantarum* or alendronate.

| Uterine weight (g) |                   |                      |                      |                      |                      |                   |
|--------------------|-------------------|----------------------|----------------------|----------------------|----------------------|-------------------|
| Sham +             | OVX +             | OVX +                | OVX +                | OVX +                | OVX +                | OVX +             |
| H <sub>2</sub> O   | H <sub>2</sub> O  | <i>Lp. plantarum</i> | <i>Lp. plantarum</i> | <i>Lp. plantarum</i> | <i>Lp. plantarum</i> | Alendronate       |
|                    |                   | $2.07 \times 10^8$   | $4.13 \times 10^8$   | $8.27 \times 10^8$   |                      | 2.5 mg/kg         |
|                    |                   | CFU/kg               | CFU/kg               | CFU/kg               |                      |                   |
| 0                  | $0.58 \pm 0.06^a$ | $0.37 \pm 0.03^b$    | $0.38 \pm 0.03^b$    | $0.37 \pm 0.02^b$    | $0.38 \pm 0.02^b$    | $0.38 \pm 0.04^b$ |

Results are expressed as the mean  $\pm$  SD ( $n = 10$ ). Values not sharing a common superscript (a, b) differed significantly (Duncan's multiple range test) ( $p < 0.05$ ).

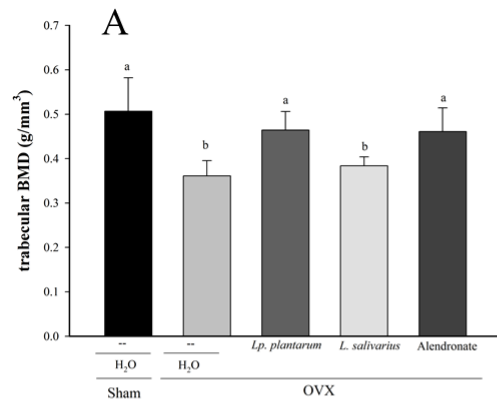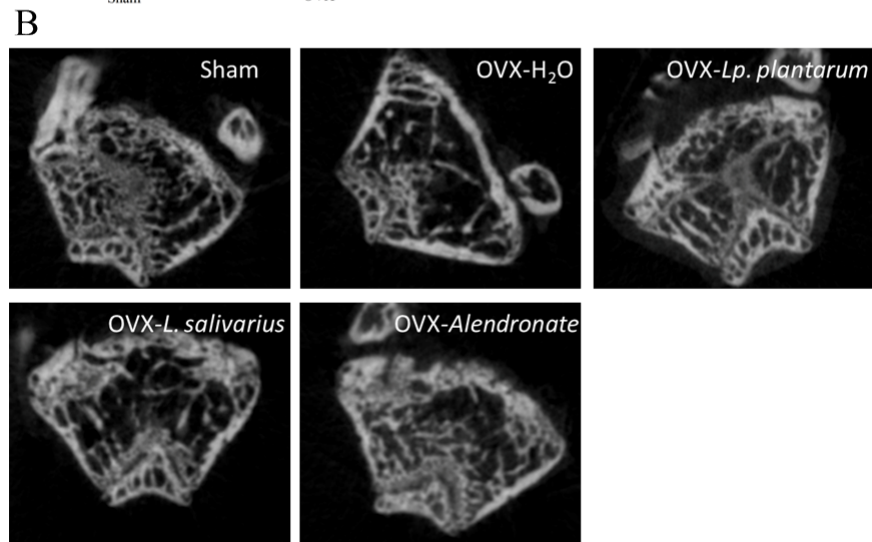

Supplementary Figure 1. Bone analysis of the femurs prepared from Sham and OVX mice treated with H<sub>2</sub>O, *Lp. plantarum* GMNL-662, *L. salivarius* and Alendronate for 4 weeks. (A) micro-CT data of trabecular bone mineral density (trabecular BMD, mg/mm<sup>3</sup>). (B) micro-CT image of the femur. Results are expressed as the mean  $\pm$  SD ( $n = 10$ ). Values not sharing a common superscript (a, b) differed significantly (Duncan's multiple range test) ( $p < 0.05$ ).
